# Supplementary material for: Microglial Activation Damages Dopaminergic Neurons through MMP-2/-9-Mediated Increase of Blood-Brain Barrier Permeability in a Parkinson’s Disease Mouse Model
Source: MDPI journal article supplement (doi:10.3390/ijms23052793), 2022-03-03
Supplement: s1 [file s1]

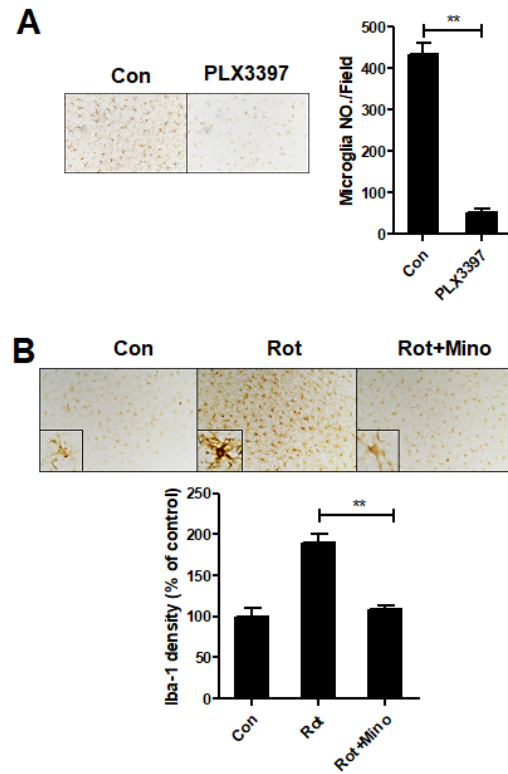

**Supplementary Figure S1. The efficiency of PLX3397 and minocycline. (A)**

Representative images of microglial staining and the number of Iba-1+ microglia in the SN of mice for each group. (B) The representative images of microglial staining and the density of Iba-1 immunostaining in the SN of mice for each group. \*\* $p < 0.01$ ; Scale bar= 50  $\mu\text{m}$ .

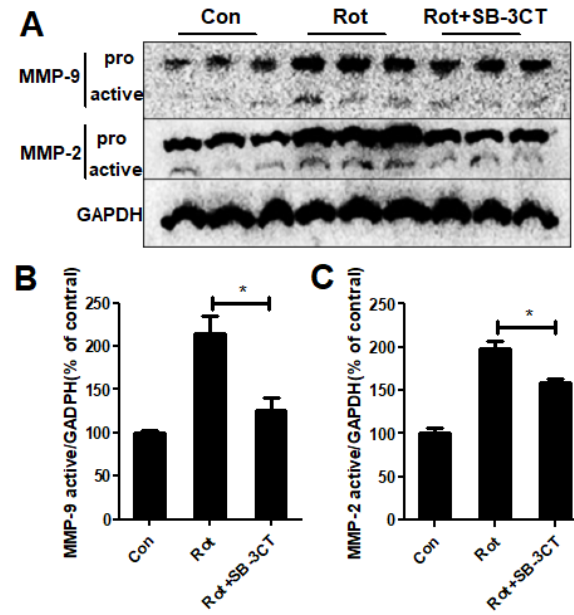

**Supplementary Figure S2. SB-3CT blocks rotenone-induced activation of MMP-2/-9 in mice.** (A) Representative blots of MMP-2/-9 in mice for each group. (B, C) The quantification of density of active MMP-2/-9 blots. \*  $p < 0.05$ .
